# Supplementary material for: Heat-related mortality in Europe during the summer of 2022
Source: PubMed Central journal article supplement (PMC10353926; doi:10.1038/s41591-023-02419-z), 2023-07-10
Supplement: 41591_2023_2419_MOESM1_ESM.pdf [file 41591_2023_2419_MOESM1_ESM.pdf]

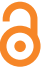

---

# Heat-related mortality in Europe during the summer of 2022

---

In the format provided by the authors and unedited

## Table of contents

### **Table S1. First-stage sensitivity analysis.**

Values correspond to European heat-related mortality numbers during the summer of 2022 (May 30<sup>th</sup> – September 4<sup>th</sup>, weeks 22-35) and the whole year of 2022 (all weeks), their corresponding 95% confidence intervals, and the Akaike Information Criterion.

### **Table S2. European sex- and age-specific heat-related mortality numbers and rates during the summer of 2022.**

Summer refers to the 14-week period between May 30<sup>th</sup> and September 4<sup>th</sup> of 2022 (weeks 22-35). All-age data by sex was not available in the United Kingdom <sup>(1)</sup>. Data by sex and age groups was not available in the United Kingdom, Ireland and Germany <sup>(2)</sup>. Values in parenthesis represent the 95% confidence intervals.

### **Table S3. Second-stage sensitivity analysis.**

Significance test for the meta-predictors (p-value), multivariate Cochran Q test for heterogeneity (p-value) and I<sup>2</sup> statistic (%).

**Table S1. First-stage sensitivity analysis.**

Values correspond to European heat-related mortality numbers during the summer of 2022 (May 30<sup>th</sup> – September 4<sup>th</sup>, weeks 22-35) and the whole year of 2022 (all weeks), their corresponding 95% confidence intervals, and the Akaike Information Criterion.

| <b>Baseline Model</b>                                                                                                                  | <b>Attributable Number (deaths)<br/>Summer 2022, Weeks 22-35</b> | <b>Attributable Number (deaths)<br/>Year 2022, All Weeks</b> | <b>Akaike Information Criterion</b> |
|----------------------------------------------------------------------------------------------------------------------------------------|------------------------------------------------------------------|--------------------------------------------------------------|-------------------------------------|
| <u>Calibration Period:</u><br>2015-2019<br><br><u>Exposure-Response:</u><br>Natural Cubic Spline<br>Knots at Percentiles P10, P50, P90 | 61672 (37643, 86807)                                             | 62862 (37935, 88780)                                         | 1,623,398                           |
| <b>Alternative Models</b>                                                                                                              | <b>Attributable Number (deaths)<br/>Summer 2022, Weeks 22-35</b> | <b>Attributable Number (deaths)<br/>Year 2022, All Weeks</b> | <b>Akaike Information Criterion</b> |
| <u>Calibration Period:</u><br>2015-2022                                                                                                | 68476 (44884, 90803)                                             | 70997 (46612, 94777)                                         | 2,611,328                           |
| <u>Exposure-Response:</u><br>B-Spline of Degree 2                                                                                      | 60479 (20606, 100609)                                            | 66563 (23778, 109667)                                        | 1,626,586                           |
| <u>Exposure-Response:</u><br>Knots at Percentiles P10, P75, P90                                                                        | 58586 (35460, 83392)                                             | 59182 (36081, 84254)                                         | 1,623,968                           |
| <u>Exposure-Response:</u><br>Knots at Percentiles P10, P25, P75, P90                                                                   | 58802 (31741, 86283)                                             | 59496 (32401, 87160)                                         | 1,626,818                           |
| <u>Exposure-Response:</u><br>Knots at Percentiles P10, P25, P50, P75, P90                                                              | 58996 (32829, 84522)                                             | 60081 (33672, 85975)                                         | 1,630,541                           |

**Table S2. European sex- and age-specific heat-related mortality numbers and rates during the summer of 2022.**

Summer refers to the 14-week period between May 30<sup>th</sup> and September 4<sup>th</sup> of 2022 (weeks 22-35). All-age data by sex was not available in the United Kingdom <sup>(1)</sup>. Data by sex and age groups was not available in the United Kingdom, Ireland and Germany <sup>(2)</sup>. Values in parenthesis represent the 95% confidence intervals.

| Age Group                      | Attributable Number (deaths) |                             |                   | Attributable Rate (deaths per million) |                     |                   |
|--------------------------------|------------------------------|-----------------------------|-------------------|----------------------------------------|---------------------|-------------------|
|                                | Women                        | Men                         | Ratio Women / Men | Women                                  | Men                 | Ratio Women / Men |
| 0-64 <sup>(2)</sup>            | 2513 (-6226, 9353)           | 3590 (225, 6540)            | 0.70              | 17 (-42, 62)                           | 24 (1, 43)          | 0.71              |
| 65-79 <sup>(2)</sup>           | 4509 (-701, 9030)            | 4252 (41, 8284)             | 1.06              | 144 (-22, 288)                         | 163 (2, 317)        | 0.88              |
| ≥ 80 <sup>(2)</sup>            | 25259 (16442, 34048)         | 11435 (5766, 16960)         | 2.21              | 1819 (1184, 2451)                      | 1432 (722, 2123)    | 1.27              |
| <b>All ages <sup>(1)</sup></b> | <b>35406 (21576, 46634)</b>  | <b>21667 (14684, 27998)</b> | <b>1.63</b>       | <b>145 (89, 192)</b>                   | <b>93 (63, 120)</b> | <b>1.56</b>       |

**Table S3. Second-stage sensitivity analysis.**Significance test for the meta-predictors (p-value), multivariate Cochran Q test for heterogeneity (p-value) and I<sup>2</sup> statistic (%).

| <b>Model</b>     | <b>Meta-Predictor</b>           | <b>Wald Test</b> | <b>Q Test</b> | <b>I<sup>2</sup> (%)</b> |
|------------------|---------------------------------|------------------|---------------|--------------------------|
| Intercept Only   | ---                             | ---              | < 0.001       | 24.9                     |
| Single Predictor | Temperature Average             | < 0.001          | < 0.001       | 20.0                     |
|                  | Temperature Interquartile Range | < 0.001          | < 0.001       | 24.5                     |
|                  | Percentage of People Aged 80+   | 0.029            | < 0.001       | 22.8                     |
| Full Model       | Temperature Average             | < 0.001          | < 0.001       | 17.4                     |
|                  | Temperature Interquartile Range | < 0.001          |               |                          |
|                  | Percentage of People Aged 80+   | < 0.001          |               |                          |
